# Supplementary material for: Red blood cell-derived extracellular vesicles as biomaterials: the opportunity of freezing-induced accelerated aging
Source: Royal Society of Chemistry journal article supplement (doi:10.1039/d5bm01349f), 2025-11-25
Supplement: d5bm01349f1.pdf [file d5bm01349f1.pdf]

## Red blood Cell-derived Extracellular Vesicles as biomaterials: the opportunity of freezing-induced accelerated aging

Lucia Paolini<sup>\*a,b</sup>, Miriam Romano<sup>\*b,c</sup>, Valentina Mangolini<sup>d,e</sup>, Selene Tassoni<sup>d,b</sup>, Shuhan Jiang<sup>f,g</sup>, Elena Laura Mazzoldi<sup>d,h</sup>, Angelo Musicò<sup>d,b,i</sup>, Andrea Zendrini<sup>b,d</sup>, Anna Kashkanova<sup>f,g</sup>, Vahid Sandoghdar<sup>f,g,l</sup>, Anna C. Berardi<sup>m</sup>, Silvia Clara Giliani<sup>d,h,n,o</sup>, Paolo Bergese<sup>d,b,o</sup> and Annalisa Radeghieri<sup>§d,b</sup>

a Dept. of Medical and Surgical Specialties, Radiological Sciences and Public Health (DSMC), University of Brescia, Brescia, Italy.

b Center for Colloid and Surface Science, (CSGI), Sesto Fiorentino (FI), Italy.

c ASST – Spedali Civili di Brescia, Brescia, Italy;

d Dept. Molecular and Translational Medicine (DMMT), University of Brescia, Brescia, Italy

e IRCCS Fondazione Don Carlo Gnocchi ONLUS, Milano, Italy.

f Max-Planck-Institut für die Physik des Lichts, 91058 Erlangen, Germany

g Max-Planck-Zentrum für Physik und Medizin, 91058 Erlangen, Germany

h “Angelo Nocivelli” Institute for Molecular Medicine, ASST Spedali Civili, 25123, Brescia, Italy

i Istituto di Scienze e Tecnologie Chimiche “Giulio Natta”- National Research Council of Italy (SCITEC-CNR), Milan, Italy.

l Department Physik, Friedrich-Alexander Universität Erlangen, Nürnberg, 91058 Erlangen, Germany

m Laboratory of Stem Cells, U.O.C. of Immunohaematology and Transfusion Medicine, Santo Spirito Hospital, Pescara, Italy

n Section of Medical Genetics and Cytogenetics, ASST Spedali Civili of Brescia, 25123 Brescia, Italy

o National Center for Gene Therapy and Drugs based on RNA Technology, Padova, Italy

\* These authors equally contributed to the work.

§ Corresponding author

## Supplementary Info

A)

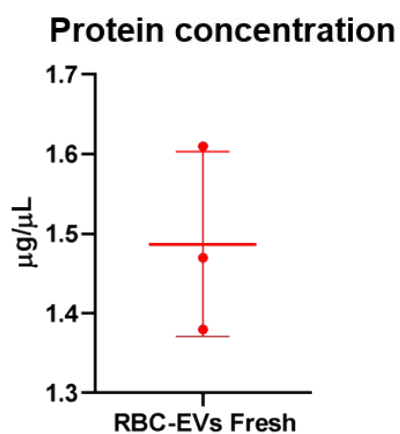

B)

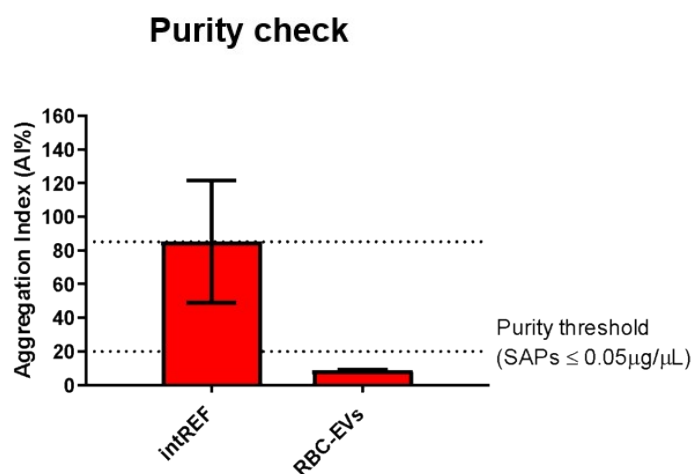

C)

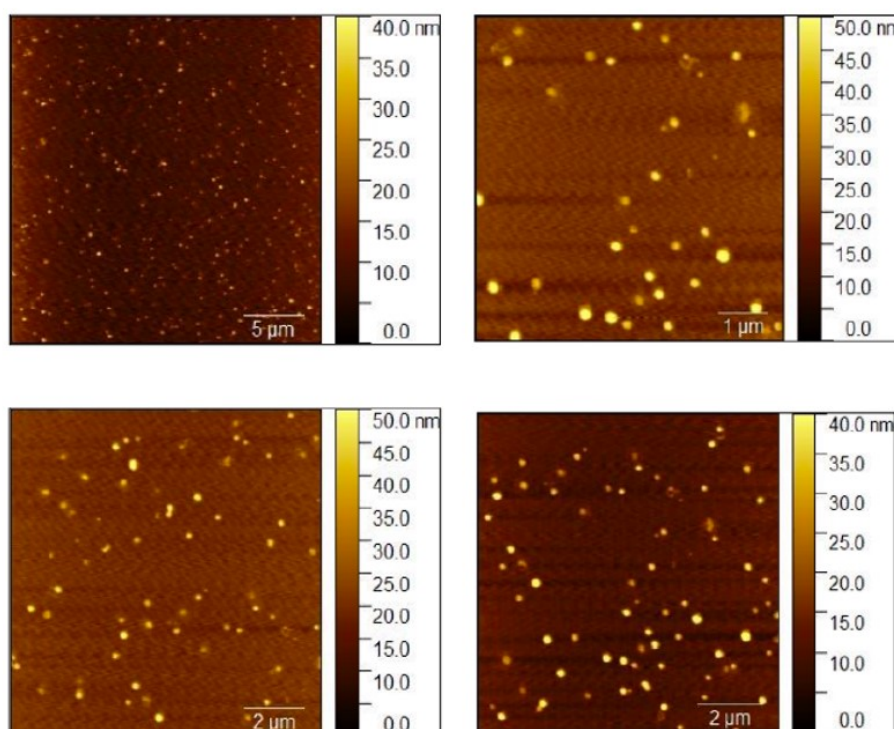

**Figure S1.** RBC-EV Fresh characterization. A) Protein concentration of Fresh RBC-EV calculated by Bradford assay. B) Purity check tested with the CONAN assay. IntREF: Internal reference control, aggregation index (AI) of AuNPs without Evs; RBC-EVs: AI of AuNPs after interaction with Fresh RBC-EV preparation. Purity determined with AI under 20% indicating a contamination of Single and

Aggregated Proteina (SAPs) below 0.05 ug/ul. (C) Representative images of Fresh RBC-EV sample by Atomic Force Microscopy (AFM) at different magnifications.

A)

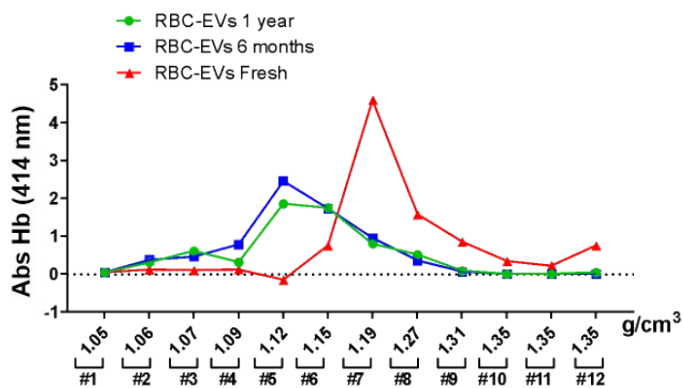

B)

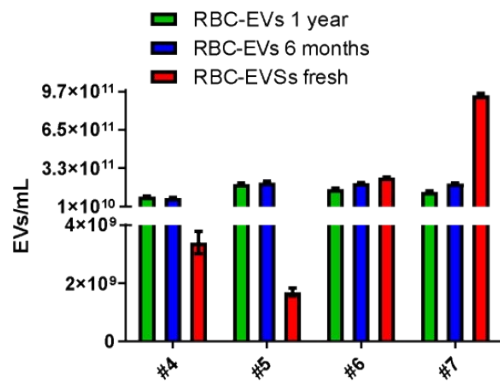

C)

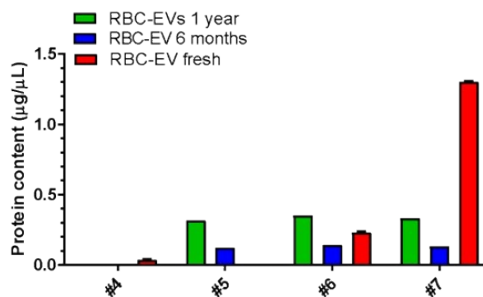

**Figure S2. Analysis of the RBC-EV Fresh, 6-month, 1-year samples after DSG processing. A) Hemoglobin distribution.** Hemoglobin distribution along DSG 12 fractions was checked determining hemoglobin absorbance at 414 nm for Fresh (red), 6-month (blue), 1-year (green) samples. C) Nanoparticle concentration from fraction 4 to fraction 7. RBC-EV concentration determined by Nanoparticle Tracking Analysis (NTA) for Fresh (red), 6 months (blue), 1-year (green) samples. D) Protein concentration from fraction 4 to fraction 7. RBC-EV protein concentration determined by Bicinchoninic acid (BCA) assay for Fresh (red), 6 month (blue), 1-year (green) samples.

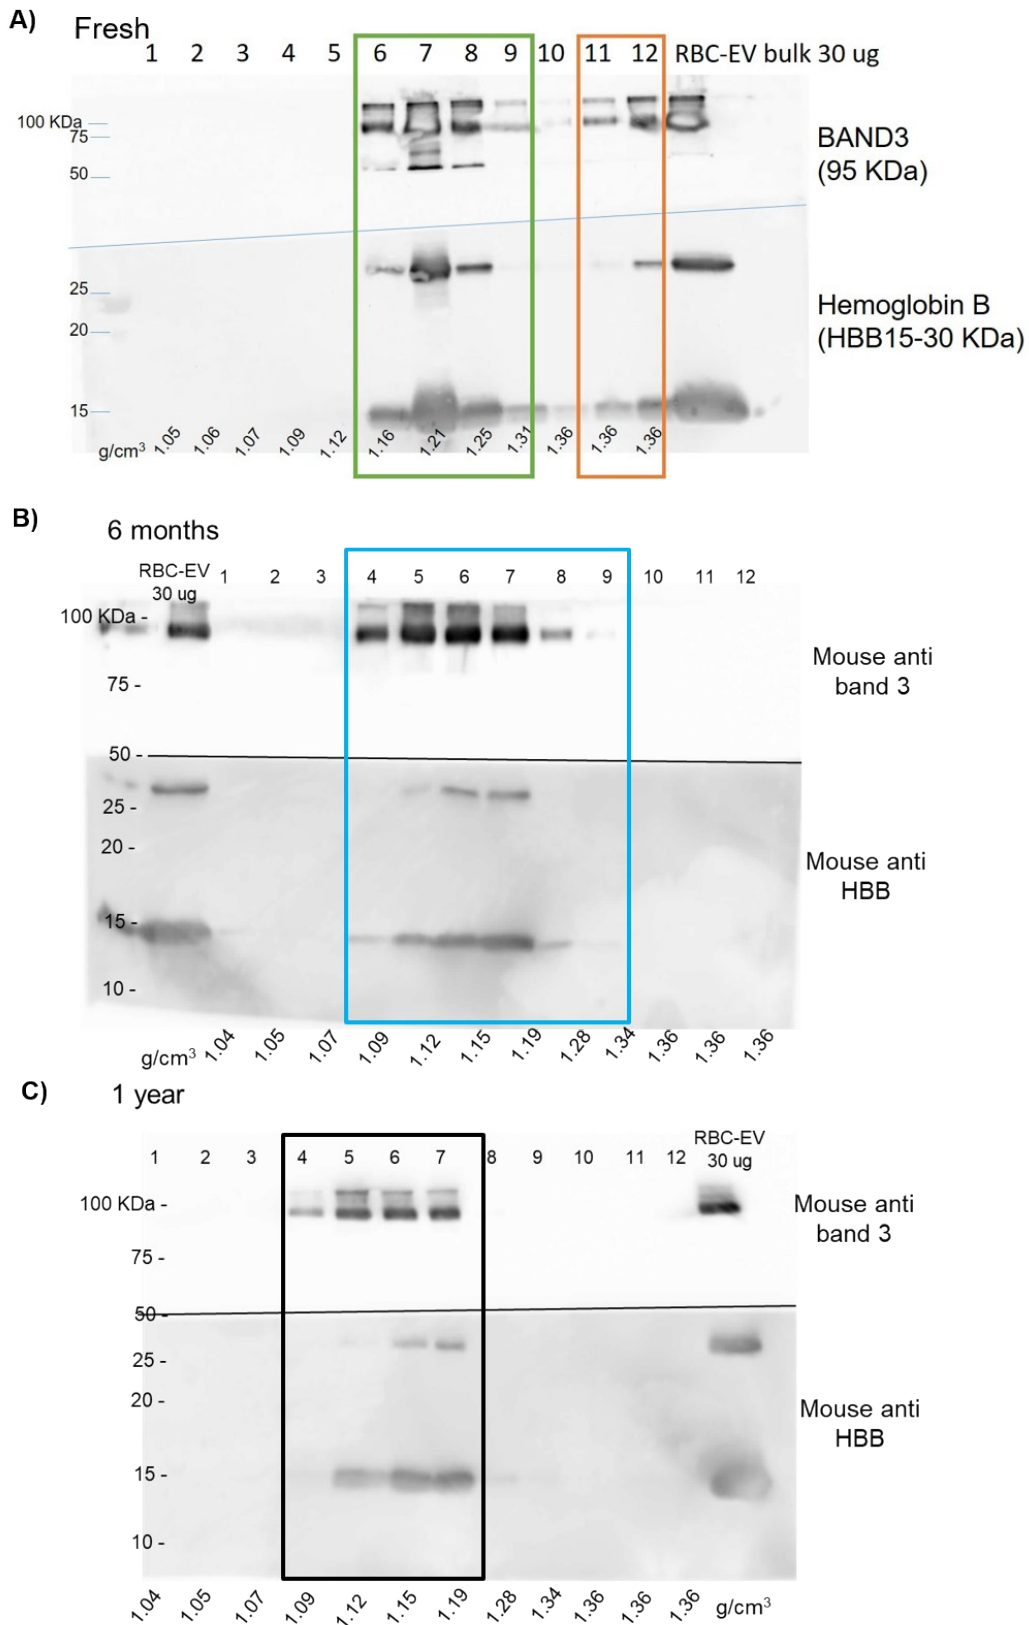

**Figure S3. Uncropped Western Blot images of gradient distribution of RBC-EVs after different storage conditions. A) Fresh RBC-EVs; B) RBC-EVs stored for 6 months at -80; C) RBC-EVs stored for 1-year at -80°C.**

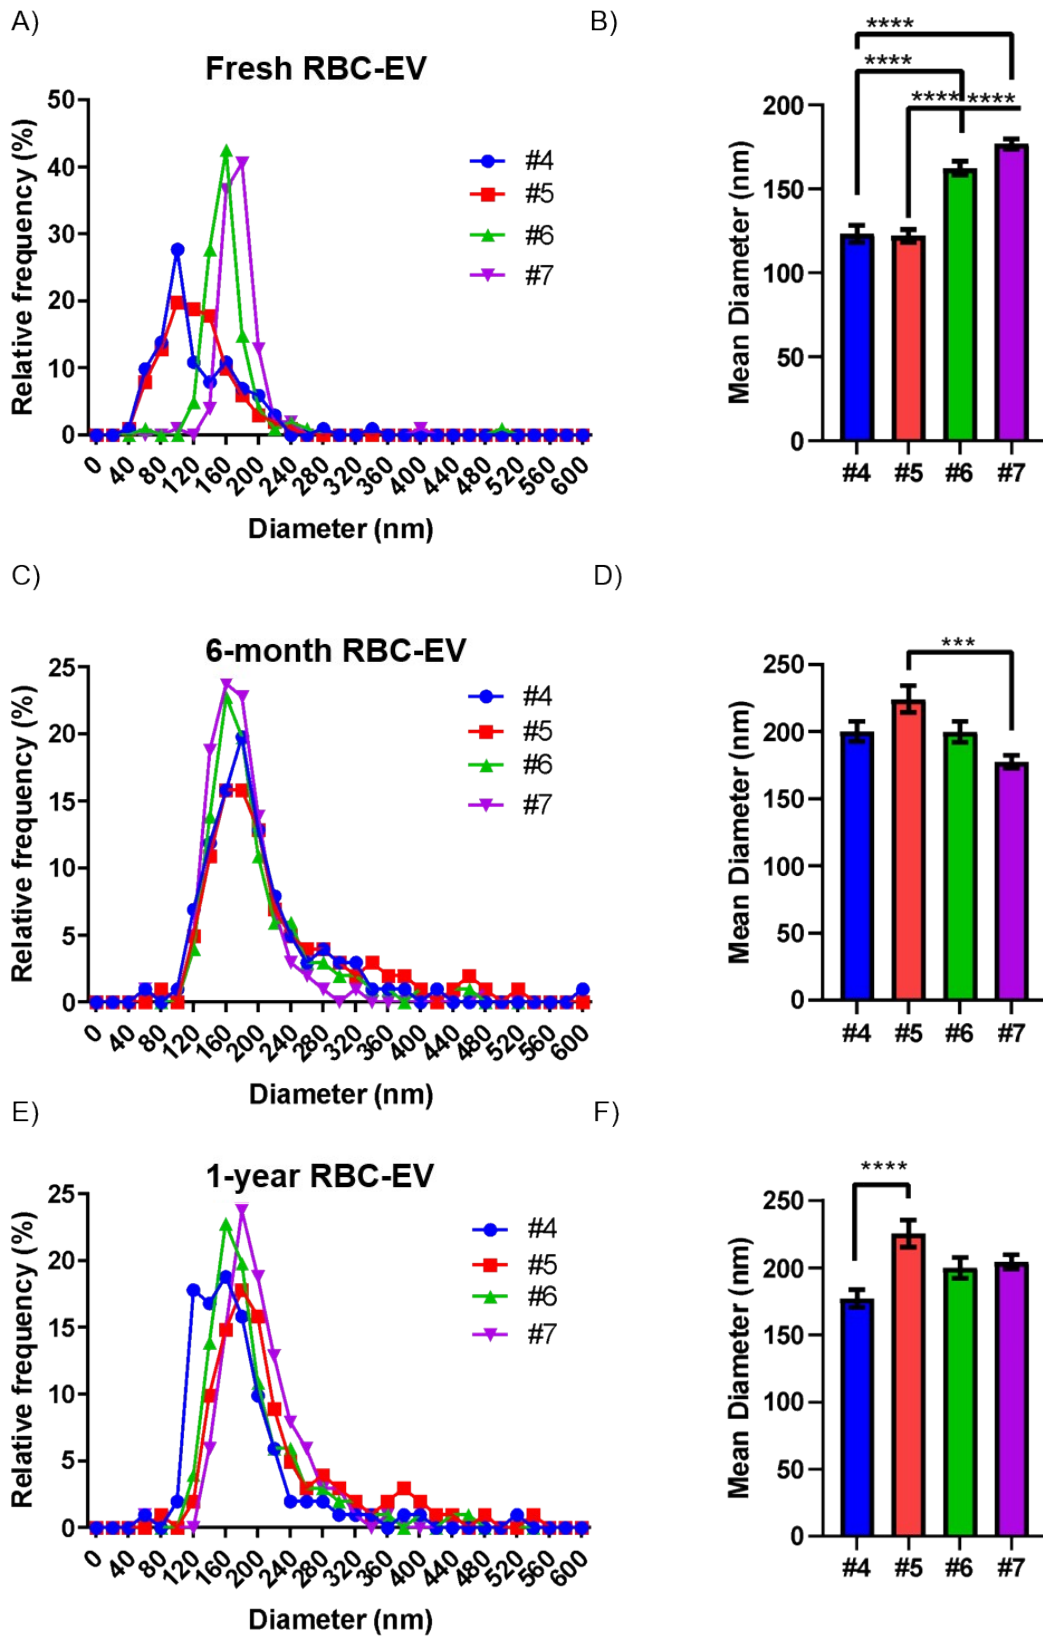

**Figure S4. Size distribution of RBC-EVs stored in different conditions determined by NTA. A)** Size distribution nanoparticles in DSG fractions from 4 to 7 for Fresh RBC-Evs, stored at +4°C **B)** Size distribution of DSG fractions from 4 to 7 of 6-months RBC-Evs, stored at -80°C for 6 months **C)** Size distribution of DSG fractions from 4 to 7 of 1-year RBC-Evs, stored at -80°C for 1 year.

A)

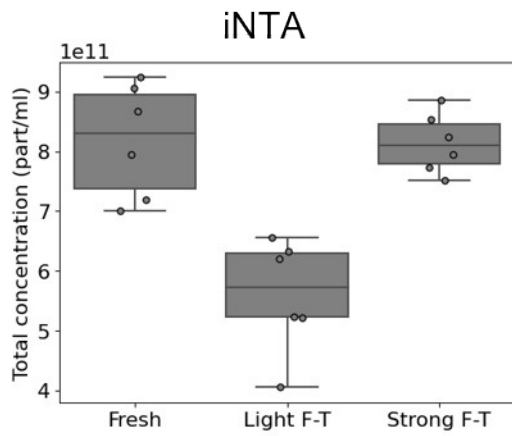

B)

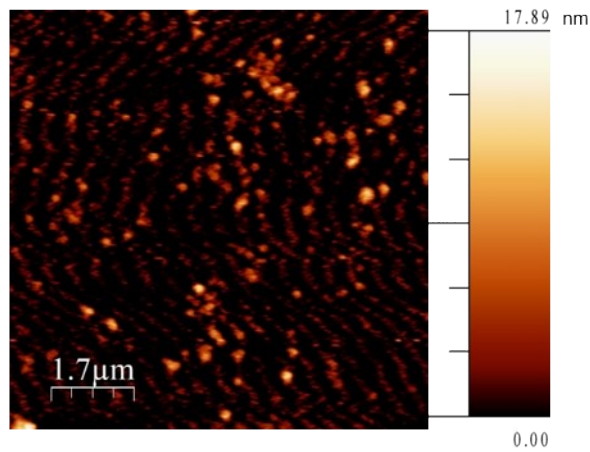

DSG fraction 4 of RBC-EV Strong F-T

C)

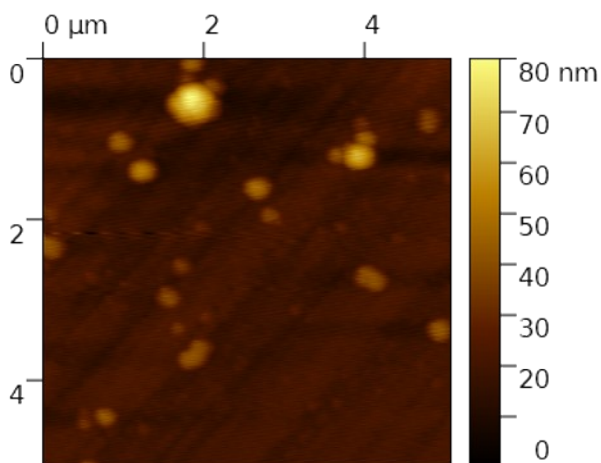

DSG fraction 7 of RBC-EV Strong F-T

**Figure S5: A)** Particle concentration measured by iNTA in Fresh sample and after Light and Strong Freeze and thaw (F-T) processing. **B)** AFM imaging of fraction 4 of DSG of Strong F-T sample. **C)** AFM imaging of fraction 7 of DSG of Strong F-T sample

A)

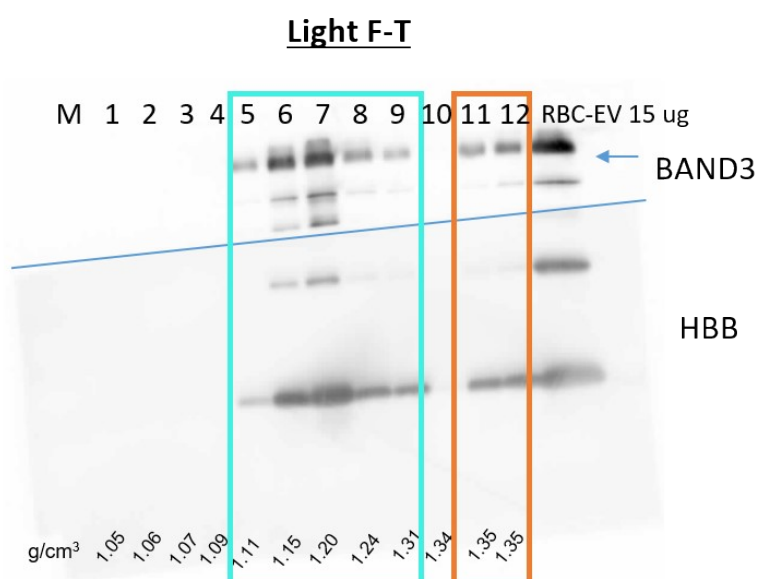

B)

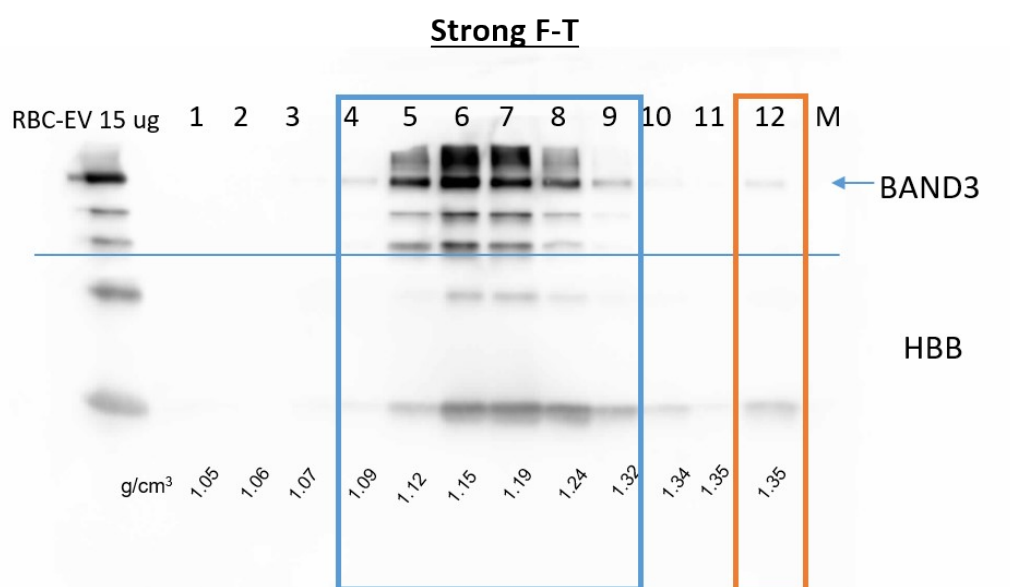

**Figure S6.** Uncropped Western Blot images of gradient distribution of RBC-EVs after Light Freeze and Thaw (Light F-T) (A) and Strong Freeze and Thaw (Strong F-T) (B) treatment.



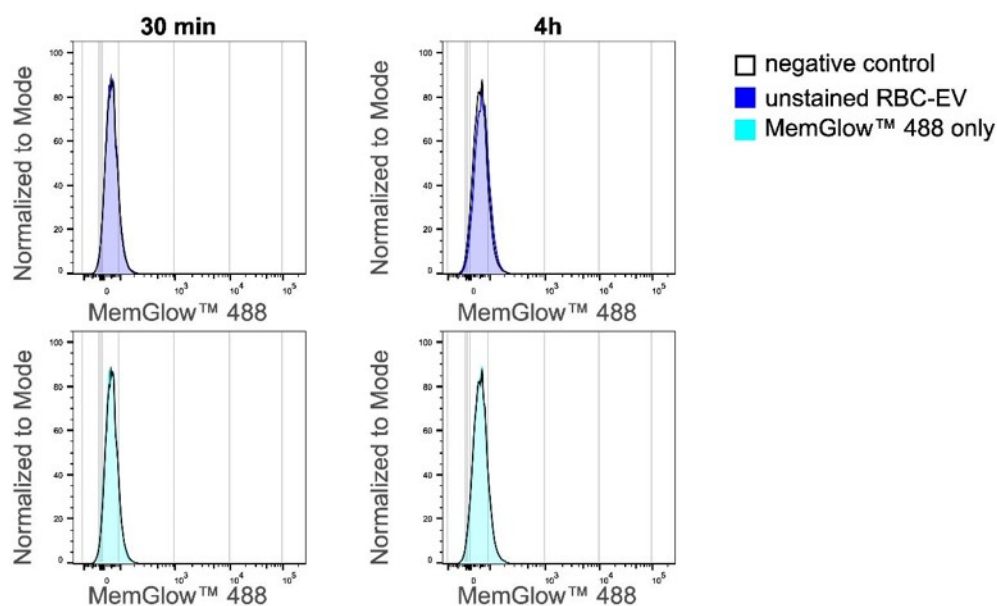

**Figure S7: Flow cytometry analysis of RBC-EV uptake.** Evaluation of unspecific fluorescent signal arising either from possibly increased cell autofluorescence (untreated cells, with histogram), due to EV internalization (unstained RBC-EV, blue hystogram) or to unbound MemGlow™ 488 fluorescent dye (MemGlow only, green histogram) incubated for 30 min or 4 hours with MDA-MB-231 cells.

| X       | Group A |       |       | Group B      |       |       | Group C    |       |       | Group D  |       |       |
|---------|---------|-------|-------|--------------|-------|-------|------------|-------|-------|----------|-------|-------|
| Minutes | PBS     |       |       | RBC-EV Fresh |       |       | F-T strong |       |       | 6 Months |       |       |
| X       | A:Y1    | A:Y2  | A:Y3  | B:Y1         | B:Y2  | B:Y3  | C:Y1       | C:Y2  | C:Y3  | D:Y1     | D:Y2  | D:Y3  |
| 0       | 0.095   | 0.097 | 0.099 | 0.419        | 0.426 | 0.420 | 0.414      | 0.418 | 0.419 | 0.350    | 0.325 | 0.320 |
| 10      | 0.134   | 0.103 | 0.098 | 0.777        | 0.747 | 0.733 | 0.749      | 0.722 | 0.708 | 0.721    | 0.632 | 0.626 |
| 20      | 0.097   | 0.095 | 0.094 | 0.870        | 0.784 | 0.756 | 0.769      | 0.727 | 0.719 | 0.815    | 0.708 | 0.714 |
| 30      | 0.098   | 0.098 | 0.096 | 0.871        | 0.781 | 0.756 | 0.774      | 0.738 | 0.720 | 0.829    | 0.714 | 0.727 |
| 60      | 0.103   | 0.101 | 0.097 | 0.862        | 0.772 | 0.745 | 0.761      | 0.727 | 0.708 | 0.830    | 0.709 | 0.722 |

**Figure S8: Achetylcholinesterase assay.** Raw data of the Acetylcholinesterase enzymatic activity. Abs 415 nm for time and Samples indicated in the Figure.
